# Supplementary material for: Metabolic and proteomic indications of diabetes progression in human aqueous humor
Source: PLoS One. 2023 Jan 18;18(1):e0280491. doi: 10.1371/journal.pone.0280491 (PMC9847982; doi:10.1371/journal.pone.0280491)
Supplement: S2 Table — (XLSX) [file pone.0280491.s003.xlsx]

## Sheet: Sheet1
Metabolite	NAD-ni Metformin	NAD-ni Glimepiride	AD Insulin
Aconitate	1.20394	1.05903	1.03157
Adonitol	1.20293	1.26707	1.15561
Alanine	1.23045	1.18438	1.22804
Beta-alanine	1.90671	1.00999	1.08881
Glycerol	-1.02485	-1.26574	1.47203
Glycine	2.32107	-1.03917	-1.02193
Heneicosylic acid	1.04477	1.08322	1.00081
Heptadecanoic acid	1.14893	1.17066	-1.02077
Isocitrate	1.01265	-1.20361	1.34079
Malate	1.96921	1.51553	1.11002
Phenylalanine	1.35079	1.27407	1.05623
Phosphoenolpyruvate	1.17348	1.10565	1.21175
Ribose	-1.06119	1.26202	1.64065
Stearate	1.14644	1.04885	-1.01673
Tryptophan	1.11996	1.03583	1.36243
Tyrosine	1.14614	1.02003	1.01635
Uracil	1.49048	1.30879	1.11131
Urea	1.19379	1.8836	1.03908
Valine	1.02844	1.23151	1.13567
